# Supplementary material
Source: Elsevier journal article supplement (https://www.sciencedirect.com/science/article/pii/S1699258X2200119X)
Supplement: mmc1 [file S1699258X2200119X:mmc1.doc]

# **Supplementary material**

**Table 1.** Index and criteria used in the MIDAS study

| **Index** | **Criteria** |
| --- | --- |
| **DAPSA** | Remission: DAPSA≤4  Low disease activity: DAPSA score >4 and ≤14  Controlled disease activity: DAPSA≤14 |
| **MDA** | It is considered to have achieved an MDA when 5 of the following 7 criteria are met:   - NPJ [0-68] ≤1; - NSJ [0-66] ≤1; - PASI≤1 or BSA≤3, patient [0-100] (in the present study we used the BSA variable); - pain score on a VAS [0-100] ≤15; - global disease activity assessed by the patient using a VAS [0-100] ≤20; - HAQ-DI [0-3] ≤5; - painful enthesis points [0-29] ≤1 according to MASES and SPARCC indexes |
| **VLDA** | Patients achieve all the following criteria:   - NPJ [0-68] ≤1; - NSJ [0-66] ≤1; - PASI≤1 or BSA≤3, patient [0-100] (in the present study we used the BSA variable); - pain score on a VAS [0-100] ≤15; - global disease activity assessed by the patient using a VAS [0-100] ≤20; - HAQ-DI [0-3] ≤5; - painful enthesis points [0-29] ≤1 according to MASES and SPARCC indexes |

BSA, body surface area; HAQ-DI, health assessment questionnaire-disability index; MASES, Maastricht ankylosing spondylitis enthesitis score; NPJ, number of painful joints; NSJ, number of swollen joints; PASI, psoriasis area and severity index; SPARCC, spondyloarthritis research consortium of Canada; VAS, visual analog scale.

**Table 2.** Principal Investigators who participated in the MIDAS study

| **Principal Investigators** | **Centre** |
| --- | --- |
| Dra. Mª Luz García Vivar | Hospital de Basurto |
| Dr. Jesús Babío Herraiz | Hospital Universitario de Cabueñes |
| Dr. Xavier Juanola | Hospital Universitari de Bellvitge |
| Dr. Jordi Gratacós | Corporació Sanitària Parc Taulí |
| Dr. Eugenio de Miguel | Hospital Universitario La Paz |
| Dr. Joaquin Belzunegui | Hospital Universitario de Donostia |
| Dra. Anna Pàmies Corts | Hospital Joan XXIII Tarragona |
| Dr. Jose J. Perez Venegas | Hospital Universitario Virgen de Macarena |
| Dr. José Luis Pablos Álvarez | Hospital Universitario 12 de Octubre |
| Dra. Emma Beltrán | Hospital del Mar |
| Dr. Jesús Sanz Sanz | Hospital Universitario Puerta de Hierro |
| Dr. Andrés Ponce | Hospital General de Granollers |
| Dra. Mª Carmen Castro Villegas | Hospital Reina Sofía de Córdoba |
| Dr. Alejandro Muñoz | Hospital Virgen del Rocío |
| Dra. Ana Urruticoetxea | Hospital Can Misses |
| Dr. José Manuel Rodríguez Heredia | Hospital Universitario De Getafe |
| Dr. Carlos García Porrúa | Hospital Universitario Lucus Augusti |
| Dr. Ignacio Villa Blanco | Hospital de Sierrallana |
| Dr. Carlos J. Rodríguez Lozano | Hospital Universitario Dr. Negrín |
| Dra. Paloma Vela | Hospital General de Alicante |
| Dr. Ceferino Barbazán | Hospital Meixoeiro de Vigo |
| Dra. Adela Gallego Flores | Complejo Hospital Universitario de Badajoz |
| Dra. Ruth López González | Hospital Provincial de Zamora |
| Dr. Javier Calvo Català | Hospital General de Valencia |
| Dr. Manel Pujol | Hospital Mutua de Terrassa |
| Dra. Susana Romero | Hospital de Pontevedra |
| Dra. Ana Cruz Valenciano | Hospital Universitario Severo Ochoa |
| Dr. Miguel Ángel Abad | Hospital Virgen del Puerto |
| Dra. Ana Paula Cacheda | Hospital Son Llátzer |
| Dr. Javier del Pino Montes | Hospital Universitario de Salamanca |
| Dr. Fernando Rodriguez | Hospital Santa Lucía de Cartagena |
| Dra. Cristina Fernández Carballido | Hospital San Juan de Alicante |
| Dr. J. Manuel Moreno | Hospital Universitario Arrixaca |
| Dra. Teresa Clavaguera | Hospital Josep Trueta |
| Dr. Javier González Polo | Hospital Nuestra Sra. Del Prado |
| Dr. Sergio Machín García | Complejo Hospitalario Universitario Insular |
| Dra. Pilar del Río | Hospital Clínico Universitario Lozano Blesa |
| Dra. Patricia Moya | Hospital de la Santa Creu i Sant Pau |
| Dr. Antonio Fernández Nebro | Complejo Hospitalario de Málaga |
